# Supplementary material
Source: PubMed Central journal article supplement (PMC8715383)
Supplement: jamapediatr-e215465-s002.pdf [file jamapediatr-e215465-s002.pdf]

## Supplementary Online Content

Frakking TT, Teoh HJ, Shelton D, et al. Effect of care coordination using an Allied Health Liaison Officer for chronic noncomplex medical conditions in children: a multicenter randomized clinical trial. *JAMA Pediatr*. Published online December 28, 2021.  
doi:10.1001/jamapediatrics.2021.5465

**eTable 1.** Comparison of Unadjusted Predicted Mean Quality-of-Life Scores Between Care Coordination and Standard Care Groups

**eTable 2.** Sensitivity Analysis

This supplementary material has been provided by the authors to give readers additional information about their work.

**eTable 1:** Comparison of unadjusted predicted mean quality-of-life scores between Care Coordination and Standard Care groups

|                                            | Care Coordination |                  |                  | Standard Care    |                  |                  | Difference in change scores between groups |         |                                |         |
|--------------------------------------------|-------------------|------------------|------------------|------------------|------------------|------------------|--------------------------------------------|---------|--------------------------------|---------|
|                                            | Baseline          | 6-Months         | 12-Months        | Baseline         | 6-Months         | 12-Months        | 6-months compared to baseline              | P-value | 12-months compared to baseline | P-value |
|                                            | Mean (SD)         |                  |                  | Mean (SD)        |                  |                  | Mean (95%CI)                               |         | Mean (95%CI)                   |         |
| <b>Total PedsQL score</b>                  | 50.50<br>(15.11)  | 62.53<br>(17.76) | 65.39<br>(16.50) | 53.39<br>(19.97) | 59.85<br>(17.28) | 61.28<br>(14.41) | 5.57<br>(-0.33 to 11.47)                   | 0.06    | 6.99<br>(0.34 to 13.64)        | 0.04    |
| <b>Physical functioning subscale score</b> | 60.30<br>(21.76)  | 73.33<br>(22.75) | 78.04<br>(22.65) | 65.82<br>(24.41) | 73.77<br>(19.69) | 77.77<br>(19.42) | 5.09<br>(-3.37 to 13.54)                   | 0.24    | 5.79<br>(-4.06 to 15.63)       | 0.25    |
| <b>Psychosocial subscale score</b>         | 45.12<br>(15.91)  | 56.34<br>(18.58) | 57.24<br>(16.77) | 45.16<br>(18.73) | 52.47<br>(20.47) | 51.97<br>(15.52) | 3.90<br>(-3.26 to 11.07)                   | 0.29    | 5.30<br>(-1.58 to 12.18)       | 0.13    |
| <b>Total PedQL Family Impact score</b>     | 45.51<br>(16.45)  | 54.48<br>(21.35) | 58.07<br>(17.19) | 45.95<br>(24.51) | 47.82<br>(20.44) | 49.76<br>(22.38) | 7.10<br>(-0.54 to 14.74)                   | 0.07    | 8.75<br>(1.18 to 16.31)        | 0.03    |
| <b>Caregiver subscale score</b>            | 47.89<br>(17.95)  | 56.64<br>(21.00) | 60.45<br>(19.49) | 46.75<br>(26.95) | 49.67<br>(22.52) | 53.03<br>(24.42) | 5.84<br>(-2.38 to 14.06)                   | 0.16    | 6.28<br>(-2.57 to 15.12)       | 0.16    |
| <b>Family functioning subscale score</b>   | 43.53<br>(23.72)  | 55.50<br>(24.40) | 60.36<br>(19.61) | 44.59<br>(27.73) | 47.39<br>(22.08) | 45.39<br>(28.27) | 9.18<br>(-1.26 to 19.61)                   | 0.09    | 16.04<br>(5.34 to 26.73)       | <0.01   |

Abbreviations: SD, Standard Deviation

**eTable 2.** Sensitivity analysis

|                                            | Generalised Estimating Equations |         | Mixed effects               |         |
|--------------------------------------------|----------------------------------|---------|-----------------------------|---------|
|                                            | Difference in change scores      | P-value | Difference in change scores | P-value |
| <b>Total PedsQL score</b>                  | 7.10                             | 0.04    | 7.14                        | 0.03    |
| <b>Physical functioning subscale score</b> | 5.83                             | 0.25    | 5.61                        | 0.26    |
| <b>Psychosocial subscale score</b>         | 5.25                             | 0.13    | 4.22                        | 0.22    |
| <b>Total PedQL Family Impact score</b>     | 8.62                             | 0.03    | 8.31                        | 0.03    |
| <b>Caregiver subscale score</b>            | 5.88                             | 0.19    | 5.51                        | 0.22    |
| <b>Family functioning subscale score</b>   | 15.83                            | <0.01   | 15.71                       | <0.01   |
