# Supplementary material
Source: PubMed Central journal article supplement (PMC8715383)
Supplement: jamapediatr-e215465-s003.pdf [file jamapediatr-e215465-s003.pdf]

## **Data Sharing Statement**

### **Data**

**Data available:** No

### **Additional Information**

**Explanation for why data not available:** Data sharing was not included in original ethics approvals.
